# Supplementary material for: Increasing the psychosocial focus in child developmental assessments: a qualitative study
Source: Springer Nature journal article supplement (doi:10.1186/s12887-023-03849-x), 2023-01-25
Supplement: MOESM1 [file 23953590]

# Additional file 1

## 5 week preventive child health examination

Date:                      Birth date:                      Examination by: Doctor  Midwife  Nurse

Mother's name:                      Child's name:

Who is accompanies the child:

### The birth

Birth weight: .....                      Born in week: .....  
Birth complications:    yes  no                       Comment: .....  
Neonatal complications:    yes  no                       Comment: .....  
Conversation with the parents about the pregnancy, birth and new-born period:                      yes  no   
Comment: .....

### Family and social conditions

Parents living together:    yes  no                       Comment: .....  
Parents healthy:                      yes  no                       Comment: .....  
Conversation about mental well-being:                      yes  no   
    The mother, problems:    yes  no                       Comment: .....  
    The father, problems:    yes  no                       Comment: .....  
No. siblings: ..... , healthy    yes  no                       Comment: .....  
Conversation about social conditions: (parents' jobs, economy, accommodation, social benefits)    yes  no   
Comment: .....  
Relationships with grandparents:    yes  no  Elaborate: .....  
.....  
Conversation about network: (relation to siblings, family, friends, colleagues, neighbours)                      yes  no   
Comment: .....  
.....

### Current

#### Regulation of the child:

Problems with breastfeeding:    yes  no                       Comment: .....  
Problems with sleep:                      yes  no                       Comment: .....  
Problems with circadian rhythm:    yes  no                       Comment: .....  
Problems with crying:                      yes  no                       Comment: .....  
Illness/health issues since birth:    yes  no                       Comment: .....  
Do the mother/parents experience problems in their care of the child?  
yes  no                       Comment: .....  
Contact with the health nurse:                      yes  no                       Comment: .....

## Health examination

Head measurement: ..... Weight: ..... Length: ..... Weight gain pr. Week: .....  
(100-400 g +/- for both boys and girls)

### Observation of collaboration, autonomy and responsiveness:

#### Mother-child:

| Did you observe? | Yes /no | Positive | Negative |
|------------------|---------|----------|----------|
| Cooperation      |         |          |          |
| Autonomy         |         |          |          |
| Responsiveness   |         |          |          |

Comments: .....

.....

#### Father-child (or other companion):

| Did you observe? | Yes /no | Positive | Negative |
|------------------|---------|----------|----------|
| Cooperation      |         |          |          |
| Autonomy         |         |          |          |
| Responsiveness   |         |          |          |

Comments: .....

.....

Was something worrying? .....

### Physical examination:

Normal interaction with the child: yes  no  Comment: .....  
(The child listens and fixates its eyes briefly) .....

Overall normal assessment: yes  no  Comment: .....  
(Casual, comfortable with calm, symmetrical movements.  
Reflexes, tonus. Lifting the head from abdominal position.  
Crying with variation) .....

Normal eye pupils, red eye reflex: yes  no  Comment: .....

Normal skull, mouth, skin, neck: yes  no  Comment: .....

Normal heart/lung stethoscopy: yes  no  Comment: .....

Normal hip joints: yes  no  Comment: .....

Normal genitals: yes  no  Comment: .....

Additional info: .....

## Overall assessment

### Short resume of important findings:

.....

.....

.....

### Follow up before next preventive child health examination:

Consultation-control  Home visiting nurse  Specialist/hospital   
Social services  Other effort  No extra effort needed

Comment: .....

.....
